# Supplementary material for: Effects of fibrillin mutations on the behavior of heart muscle cells in Marfan syndrome
Source: PubMed Central journal article supplement (PMC7542175; doi:10.1038/s41598-020-73802-w), 2020-10-07

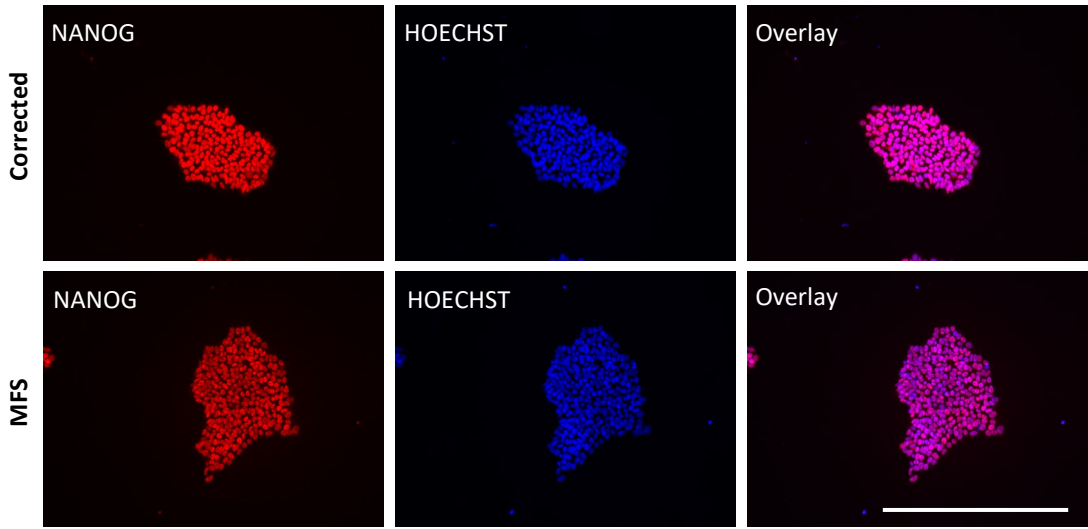

Supplement: 41598_2020_73802_MOESM2_ESM.pdf [file 41598_2020_73802_MOESM2_ESM.pdf]
